# Supplementary material for: In-depth genome characterization of a Brazilian common bean core collection using DArTseq high-density SNP genotyping
Source: PubMed Central journal article supplement (PMC5450071; doi:10.1186/s12864-017-3805-4), 2017-05-30

Genetic differentiation ( $F_{ST}$ ) by sliding window (100 Kbp) between Cultivars/Lines and Landraces per gene pool

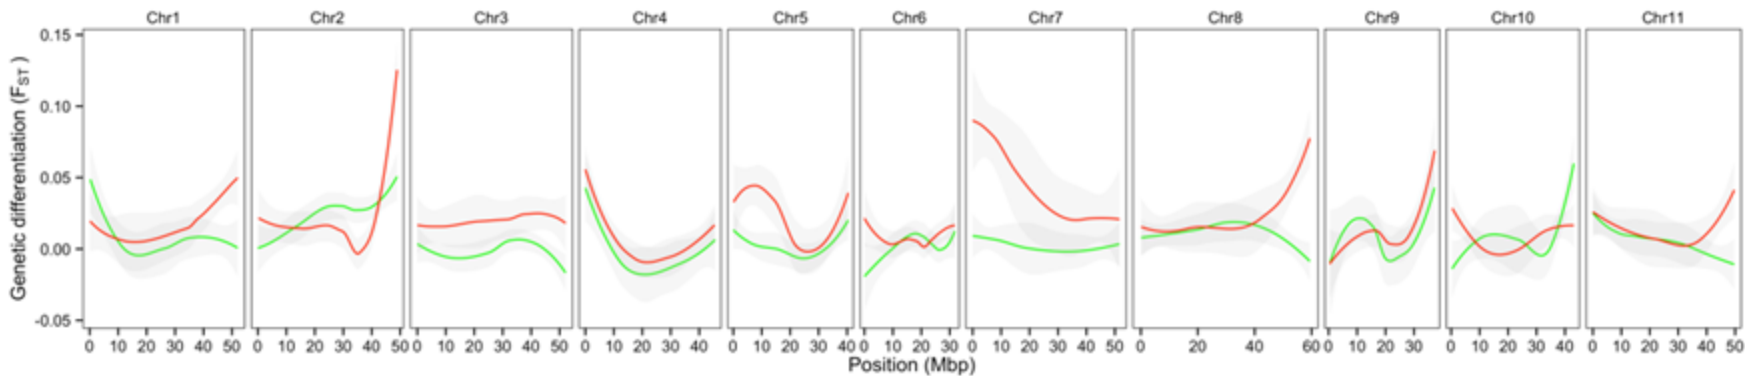

Watterson's nucleotide diversity by sliding window (100 Kbp) between Cultivars/Lines and Landraces per gene pool

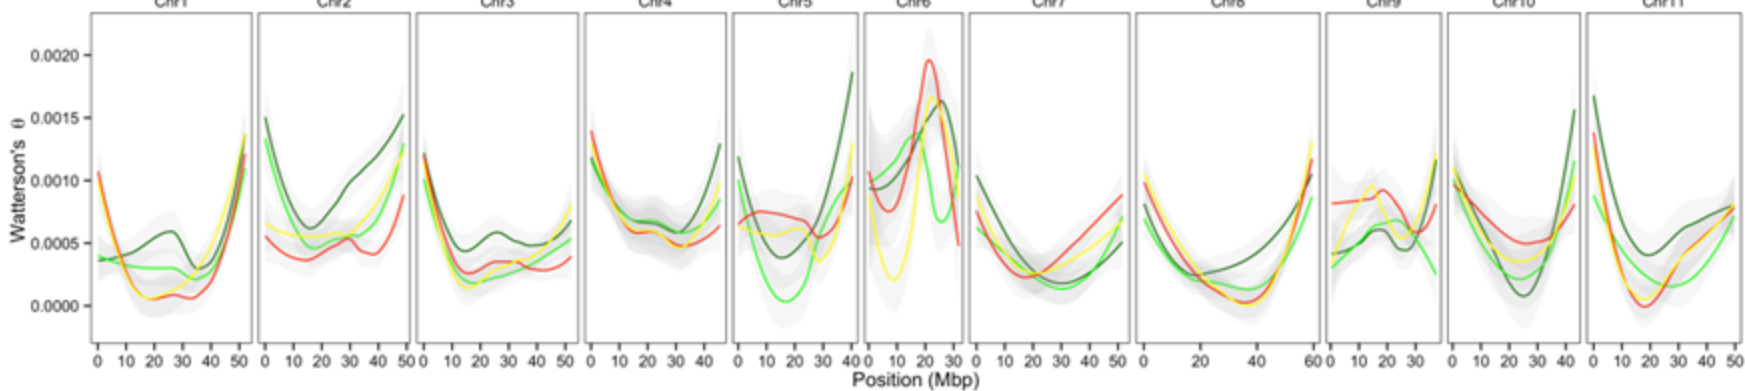

Tajima's D by sliding window (100 Kbp) between Cultivars/Lines and Landraces per gene pool

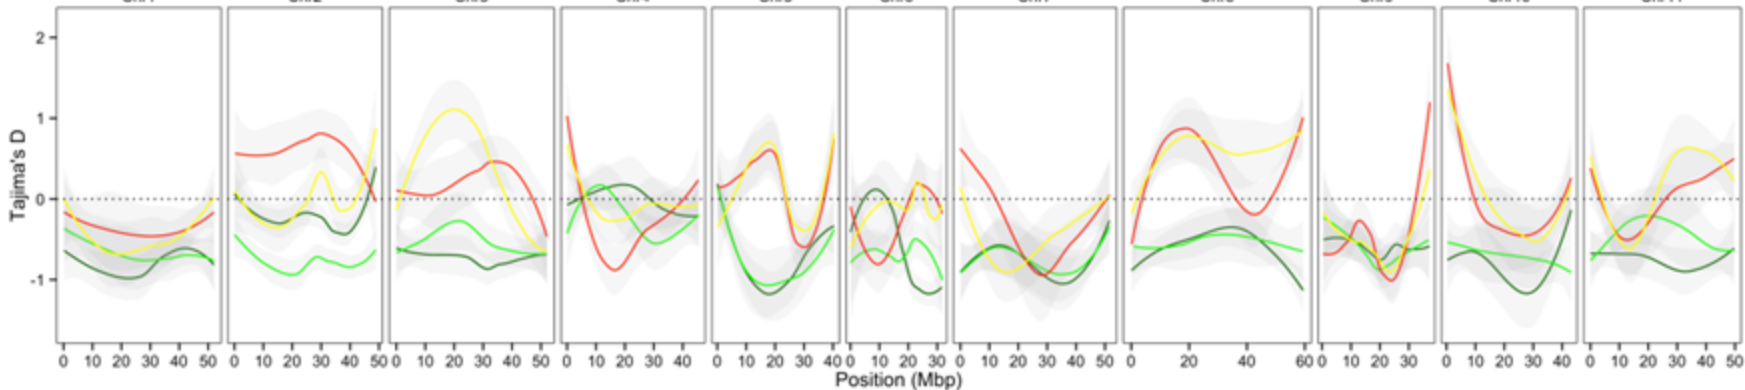

Supplement: 12864_2017_3805_MOESM7_ESM.pdf [file 12864_2017_3805_MOESM7_ESM.pdf]
