# Supplementary material for: In-depth genome characterization of a Brazilian common bean core collection using DArTseq high-density SNP genotyping
Source: PubMed Central journal article supplement (PMC5450071; doi:10.1186/s12864-017-3805-4), 2017-05-30

Distribution of number of SNPs into MAF classes

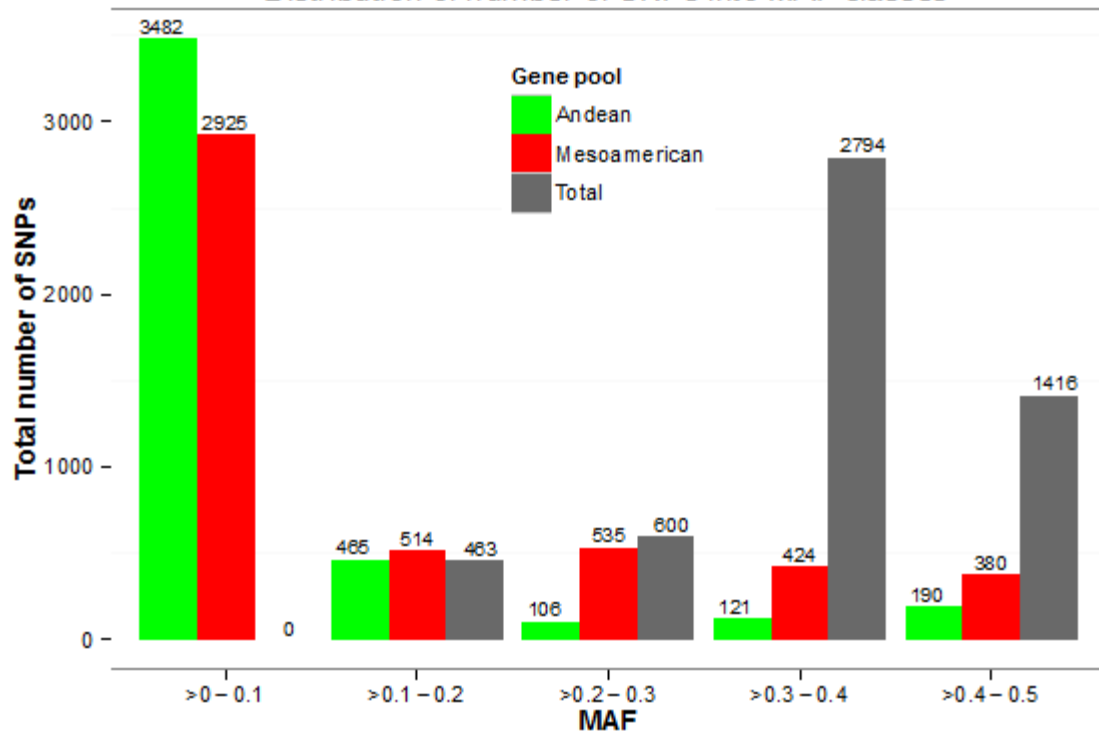

Distribution of number of SNPs into MAF classes

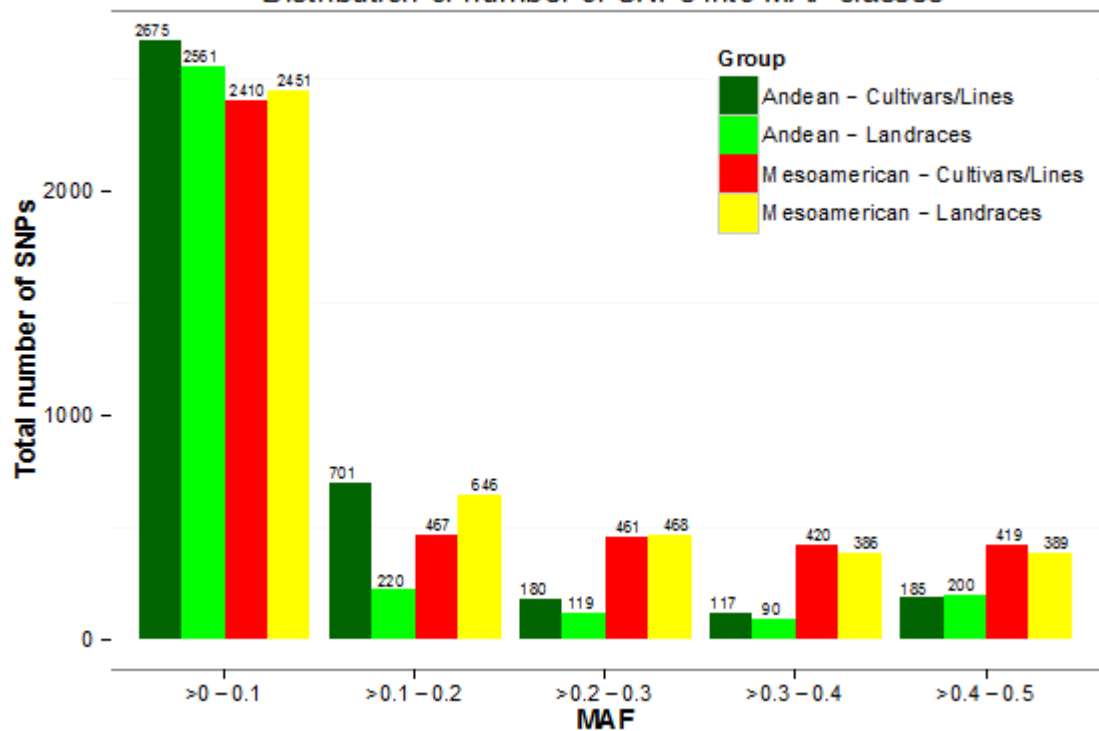

Supplement: 12864_2017_3805_MOESM8_ESM.pdf [file 12864_2017_3805_MOESM8_ESM.pdf]
