# Supplementary material for: In-depth genome characterization of a Brazilian common bean core collection using DArTseq high-density SNP genotyping
Source: BMC Genomics. 2017 May 30;18:423. doi: 10.1186/s12864-017-3805-4 (PMC5450071; doi:10.1186/s12864-017-3805-4)
Supplement: Supplementary file 1 — Identification of the common bean accessions used in the SNP analysis, the gene pool origin, type of germplasm, institution of origin, and the commercial type of grain. (XLSX 18 kb) [file 12864_2017_3805_MOESM1_ESM.xlsx]

## Sheet: Additional file 1
Genotype	Genotype code	Gene Pool	Germoplasm Type	Origin	Commercial grain type	Grain size
BRS Cometa	BGF0018670	mesoamerican	cultivar/line	Brazil	carioca*	medium
BRS Pontal	BGF0007813	mesoamerican	cultivar/line	Brazil	carioca*	medium
CF200002	BGF0015994	andean	landrace	Brazil	rajado*	large
CF200003	BGF0015995	mesoamerican	landrace	Brazil	yellow	small
CF200005	BGF0015997	mesoamerican	landrace	Brazil	carioca*	small
CF200006	BGF0015998	mesoamerican	landrace	Brazil	red	medium
CF200007	BGF0015999	mesoamerican	landrace	Brazil	carioca*	small
CF200008	BGF0016000	andean	landrace	Brazil	red	small
CF200009	BGF0016001	andean	landrace	Brazil	purple	large
CF200010	BGF0016002	mesoamerican	landrace	Brazil	rosinha*	small
CF200011	BGF0016003	andean	landrace	Brazil	black	medium
CF200012	BGF0016004	mesoamerican	landrace	Brazil	black	small
CF200013	BGF0016005	mesoamerican	landrace	Brazil	black	small
CF200015	BGF0016007	mesoamerican	landrace	Brazil	black	small
CF200018	BGF0016010	mesoamerican	landrace	Brazil	black	medium
CF200019	BGF0016011	mesoamerican	landrace	Brazil	black	small
CF200042	BGF0016034	mesoamerican	landrace	Brazil	black	small
CF200043	BGF0016035	mesoamerican	landrace	Brazil	carioca*	small
CF200044	BGF0016036	andean	landrace	Brazil	rajado*	medium
CF200044	BGF0016036	andean	landrace	Brazil	rajado*	medium
CF200048	BGF0016040	andean	landrace	Brazil	rajado*	large
CF200051	BGF0016043	andean	landrace	Brazil	others**	large
CF200056	BGF0016048	andean	landrace	Brazil	others**	large
CF200059	BGF0016051	andean	landrace	Brazil	rajado*	medium
CF200060	BGF0016052	andean	landrace	Brazil	others**	large
CF200067	BGF0016059	andean	landrace	Brazil	yellow	small
CF200067	BGF0016059	andean	landrace	Brazil	yellow	small
CF200068	BGF0016060	andean	landrace	Brazil	yellow	large
CF200070	BGF0016062	mesoamerican	landrace	Brazil	brown	small
CF200071	BGF0016063	mesoamerican	landrace	Brazil	black	small
CF200072	BGF0016064	mesoamerican	landrace	Brazil	carioca*	medium
CF200073	BGF0016065	mesoamerican	landrace	Brazil	brown	medium
CF200074	BGF0016066	mesoamerican	landrace	Brazil	others**	small
CF200075	BGF0016067	mesoamerican	landrace	Brazil	others**	small
CF200082	BGF0016074	mesoamerican	landrace	Brazil	red	medium
CF200086	BGF0016078	mesoamerican	landrace	Brazil	rosinha*	small
CF200090	BGF0016082	mesoamerican	landrace	Brazil	others**	small
CF210002	BGF0016084	mesoamerican	landrace	Brazil	brown	small
CF220276	BGF0016089	mesoamerican	landrace	Brazil	carioca*	small
CF220279	BGF0016092	mesoamerican	landrace	Brazil	black	small
CF220283	BGF0016096	andean	landrace	Brazil	mulatinho*	large
CF230005	BGF0016103	andean	landrace	Brazil	black	large
CF230029	BGF0016124	mesoamerican	landrace	Brazil	yellow	small
CF240002	BGF0016128	mesoamerican	landrace	Brazil	rosinha*	small
CF240005	BGF0016131	mesoamerican	landrace	Brazil	carioca*	medium
CF240013	BGF0016139	mesoamerican	landrace	Brazil	brown	small
CF240020	BGF0016146	mesoamerican	landrace	Brazil	mulatinho*	small
CF240021	BGF0016147	andean	landrace	Brazil	rosinha*	small
CF240029	BGF0016155	andean	landrace	Brazil	red	medium
CF240048	BGF0016174	mesoamerican	landrace	Brazil	rosinha*	medium
CF240050	BGF0016176	andean	landrace	Brazil	purple	medium
CF240060	BGF0016186	andean	landrace	Brazil	black	medium
CF240065	BGF0016195	andean	landrace	Brazil	red	large
CF240074	BGF0016204	mesoamerican	landrace	Brazil	rosinha*	small
CF240080	BGF0016210	mesoamerican	landrace	Brazil	brown	medium
CF240084	BGF0016214	mesoamerican	landrace	Brazil	red	small
CF240097	BGF0016227	mesoamerican	landrace	Brazil	red	medium
CF240107	BGF0016237	andean	landrace	Brazil	rajado*	large
CF800003	BGF0011750	mesoamerican	landrace	Brazil	mulatinho*	small
CF800004	BGF0011751	mesoamerican	landrace	Brazil	purple	small
CF800015	BGF0011762	mesoamerican	landrace	Brazil	rosinha*	small
CF800017	BGF0011764	mesoamerican	landrace	Brazil	mulatinho*	small
CF800027	BGF0011774	mesoamerican	landrace	Brazil	purple	small
CF800031	BGF0011778	mesoamerican	landrace	Brazil	carioca*	medium
CF800032	BGF0011779	mesoamerican	landrace	Brazil	carioca*	medium
CF800049	BGF0011796	andean	landrace	Brazil	rajado*	large
CF800111	BGF0011855	mesoamerican	landrace	Brazil	rosinha*	small
CF800121	BGF0011865	mesoamerican	landrace	Brazil	brown	small
CF800130	BGF0011874	mesoamerican	landrace	Brazil	black	small
CF800356	BGF0012090	andean	landrace	Brazil	rajado*	small
CF810085	BGF0012298	andean	landrace	Brazil	yellow	large
CF810313	BGF0012526	mesoamerican	landrace	Brazil	others**	small
CF810320	BGF0012533	mesoamerican	landrace	Brazil	mulatinho*	small
CF810415	BGF0012628	andean	landrace	Brazil	mulatinho*	large
CF830185	BGF0012904	mesoamerican	landrace	Brazil	black	small
CF840014	BGF0013297	admixture	landrace	Brazil	carioca*	medium
CF840024	BGF0013307	mesoamerican	landrace	Brazil	brown	medium
CF840151	BGF0013434	andean	landrace	Brazil	white	large
CF840222	BGF0013505	mesoamerican	landrace	Brazil	black	small
CF840275	BGF0013558	mesoamerican	landrace	Brazil	white	medium
CF840278	BGF0013561	mesoamerican	landrace	Brazil	brown	medium
CF840279	BGF0013562	admixture	landrace	Brazil	others**	medium
CF840328	BGF0013611	mesoamerican	landrace	Brazil	black	medium
CF840404	BGF0013687	mesoamerican	landrace	Brazil	carioca*	medium
CF840650	BGF0013925	andean	landrace	Brazil	others**	large
CF840725	BGF0014000	andean	landrace	Brazil	red	medium
CF840745	BGF0014020	andean	landrace	Brazil	red	medium
CF840746	BGF0014021	andean	landrace	Brazil	red	large
CF860079	BGF0014697	mesoamerican	landrace	Brazil	yellow	small
CF870138	BGF0014855	andean	landrace	Brazil	red	large
CF870147	BGF0014864	mesoamerican	landrace	Brazil	rajado*	small
CF871133	BGF0015403	andean	landrace	Brazil	others**	large
CF890193	BGF0015887	mesoamerican	landrace	Brazil	carioca*	small
CNF000480	BGF0000480	mesoamerican	cultivar/line	Brazil	black	medium
CNF000784	BGF0000784	admixture	cultivar/line	Russia	rajado*	small
CNF000840	BGF0000840	andean	cultivar/line	France	black	small
CNF000878	BGF0000878	andean	cultivar/line	Argentina	yellow	medium
CNF001569	BGF0001569	mesoamerican	cultivar/line	Guatemala	black	medium
CNF001574	BGF0001574	andean	cultivar/line	USA	red	small
CNF001591	BGF0001591	mesoamerican	cultivar/line	Germany	black	medium
CNF001602	BGF0001602	andean	cultivar/line	South Africa	black	medium
CNF001611	BGF0001611	admixture	cultivar/line	USA	rajado*	medium
CNF002017	BGF0002017	andean	cultivar/line	Australia	purple	small
CNF002023	BGF0002023	andean	cultivar/line	Chile	black	small
CNF003730	BGF0003730	andean	cultivar/line	Mexico	yellow	medium
CNF004514	BGF0004514	mesoamerican	cultivar/line	Colombia	black	medium
CNF004582	BGF0004582	mesoamerican	cultivar/line	Brazil	black	small
CNF004640	BGF0004640	mesoamerican	cultivar/line	Brazil	black	medium
CNF004681	BGF0004681	mesoamerican	cultivar/line	Colombia	black	medium
CNF004856	BGF0004856	mesoamerican	cultivar/line	Brazil	rosinha*	small
CNF004947	BGF0004947	andean	cultivar/line	Brazil	others**	large
CNF005001	BGF0005001	andean	cultivar/line	Uruguay	others**	medium
CNF005460	BGF0005460	andean	cultivar/line	South Africa	rajado*	large
CNF005482	BGF0005482	mesoamerican	cultivar/line	Brazil	black	small
CNF005494	BGF0005494	mesoamerican	cultivar/line	Brazil	black	medium
CNF005520	BGF0005520	mesoamerican	cultivar/line	Brazil	mulatinho*	medium
CNF005598	BGF0005598	mesoamerican	cultivar/line	Brazil	black	small
CNF005601	BGF0005601	mesoamerican	cultivar/line	Brazil	mulatinho*	small
CNF005613	BGF0005613	mesoamerican	cultivar/line	Brazil	carioca*	medium
CNF005823	BGF0005823	mesoamerican	cultivar/line	Brazil	rajado*	medium
CNF005824	BGF0005824	mesoamerican	cultivar/line	Brazil	carioca*	medium
CNF005887	BGF0005887	mesoamerican	cultivar/line	Brazil	carioca*	medium
CNF005923	BGF0005923	mesoamerican	cultivar/line	Brazil	black	medium
CNF005929	BGF0005929	mesoamerican	cultivar/line	Brazil	black	small
CNF006141	BGF0006141	andean	cultivar/line	Brazil	white	medium
CNF006514	BGF0006514	mesoamerican	cultivar/line	USA	purple	medium
CNF006715	BGF0006715	andean	cultivar/line	India	rajado*	medium
CNF006760	BGF0006760	mesoamerican	cultivar/line	Brazil	mulatinho*	small
CNF006772	BGF0006772	mesoamerican	cultivar/line	Brazil	carioca*	medium
CNF006872	BGF0006872	mesoamerican	cultivar/line	Brazil	black	small
CNF006978	BGF0006978	andean	cultivar/line	Argentina	rajado*	large
CNF006979	BGF0006979	admixture	cultivar/line	Argentina	white	large
CNF007050	BGF0007050	mesoamerican	cultivar/line	Brazil	purple	medium
CNF007057	BGF0007057	mesoamerican	cultivar/line	Brazil	black	medium
CNF007090	BGF0007090	mesoamerican	cultivar/line	Brazil	black	small
CNF007098	BGF0007098	mesoamerican	cultivar/line	Brazil	carioca*	medium
CNF007131	BGF0007131	mesoamerican	cultivar/line	Brazil	others**	medium
CNF007135	BGF0007135	mesoamerican	cultivar/line	Brazil	mulatinho*	medium
CNF007137	BGF0007137	mesoamerican	cultivar/line	Brazil	carioca*	medium
CNF007143	BGF0007143	mesoamerican	cultivar/line	Brazil	black	medium
CNF007359	BGF0007359	mesoamerican	cultivar/line	Brazil	black	small
CNF007381	BGF0007381	admixture	cultivar/line	Egypt	white	medium
CNF007382	BGF0007382	mesoamerican	cultivar/line	Brazil	black	medium
CNF007533	BGF0007533	mesoamerican	cultivar/line	Brazil	black	medium
CNF007552	BGF0007552	mesoamerican	cultivar/line	Brazil	rosinha*	medium
CNF007559	BGF0007559	mesoamerican	cultivar/line	Brazil	mulatinho*	medium
CNF007569	BGF0007569	mesoamerican	cultivar/line	Brazil	carioca*	small
CNF007606	BGF0007606	andean	cultivar/line	Brazil	rajado*	medium
CNF007646	BGF0007646	andean	cultivar/line	Italy	rajado*	large
CNF007648	BGF0007648	andean	cultivar/line	France	rajado*	medium
CNF007659	BGF0007659	andean	cultivar/line	USA	purple	large
CNF007666	BGF0007666	andean	cultivar/line	Netherlands	rajado*	large
CNF007672	BGF0007672	andean	cultivar/line	Venezuela	rajado*	medium
CNF007800	BGF0007800	mesoamerican	cultivar/line	Colombia	black	medium
CNF007806	BGF0007806	mesoamerican	cultivar/line	Brazil	carioca*	medium
CNF007813	-	andean	cultivar/line	Brazil	carioca*	medium
CNF007844	BGF0007844	mesoamerican	cultivar/line	Brazil	carioca*	medium
CNF007845	BGF0007845	mesoamerican	cultivar/line	Brazil	carioca*	medium
CNF007866	BGF0007866	mesoamerican	cultivar/line	Brazil	purple	medium
CNF007893	BGF0007893	mesoamerican	cultivar/line	Brazil	mulatinho*	medium
CNF007904	BGF0007904	mesoamerican	cultivar/line	Brazil	carioca*	small
CNF007907	BGF0007907	mesoamerican	cultivar/line	Brazil	black	small
CNF008104	BGF0008104	mesoamerican	cultivar/line	Brazil	black	medium
CNF008202	BGF0008202	mesoamerican	cultivar/line	Brazil	carioca*	medium
CNF008782	BGF0008782	andean	cultivar/line	Nicaragua	purple	large
CNF009299	BGF0009299	andean	cultivar/line	Panama	rajado*	medium
CNF009595	BGF0009595	mesoamerican	cultivar/line	Brazil	carioca*	small
CNF009846	BGF0009846	andean	cultivar/line	Colombia	rajado*	large
CNF010003	BGF0010003	mesoamerican	cultivar/line	Brazil	black	medium
CNF010015	BGF0010015	andean	cultivar/line	Brazil	carioca*	medium
CNF010316	BGF0010316	mesoamerican	cultivar/line	Colombia	mulatinho*	medium
CNF010324	BGF0010324	mesoamerican	cultivar/line	Brazil	carioca*	medium
CNF011035	BGF0011035	mesoamerican	cultivar/line	Honduras	others**	small
CNF011036	BGF0011036	mesoamerican	cultivar/line	Japan	brown	medium
CNF011201	BGF0011200	andean	cultivar/line	Colombia	rajado*	medium
CNF011205	BGF0011204	andean	cultivar/line	Uganda	others**	large
CNF011274	BGF0011273	mesoamerican	cultivar/line	Spain	white	medium
CNF011324	BGF0011323	andean	cultivar/line	Zaire	brown	large
CNF011332	BGF0011330	andean	cultivar/line	Iran	rajado*	medium
CNF011351	BGF0011350	andean	cultivar/line	Camaroon	black	large
CNF011368	BGF0011367	andean	cultivar/line	Cuba	purple	large
CNF011370	BGF0011369	andean	cultivar/line	Colombia	rajado*	medium
CNF011463	BGF0011462	andean	cultivar/line	Guatemala	purple	medium
CNF011527	BGF0011526	andean	cultivar/line	Uganda	others**	large
CNF011707	BGF0011707	admixture	cultivar/line	Chile	white	medium
CNF011743	BGF0011743	mesoamerican	cultivar/line	Brazil	black	small
Guará	-	mesoamerican	cultivar/line	Brazil	carioca*	medium
IAC Diplomata	-	mesoamerican	cultivar/line	Brazil	black	medium
*Brazilian commercial grain type name
**Commercial grain type not defined
